# Supplementary material for: Exploring the Immediate Effects of an Online Self-Regulation Intervention on Pain, Affect, and Arousal in Women with Endometriosis: An Observational Study Protocol
Source: Research Square preprint supplement (doi:10.21203/rs.3.rs-5969427/v1), 2025-02-21
Supplement: Supplementary file 1 [file c295799069141ff31c698f47.docx]

# **Supplementary Material**

# Sessions Transcript

### **Example 1**

### **Landing attention into the body and deep breathing**

We will begin as usual, sitting with our backs supported by the chair, hands resting on the thighs. Close your eyes and set everything else aside—let go of any previous conversations or external tasks. Allow yourself, from this moment on, to turn your attention fully to your body.

Settle into a comfortable seated position, adjusting as needed, and gradually minimize movement. Bring your attention closer to your body, starting by noticing the contact of your body with the chair. Observe the presence of your entire body—its posture, shape, volume, and weight.

It is natural for the mind to wander. This is not a problem. Each time you notice distraction, patiently guide your attention back to the presence of your body.

Now, shift your awareness to your natural breath. Notice the sensation of air passing through your nostrils and the spontaneous movements of your abdomen. Then, gently deepen your breathing:

- Inhale slowly and deeply through the nose, with minimal effort, allowing the air to enter gradually.
- Exhale through the mouth, prolonging the release of air, slowing it down naturally.
- Adjust the depth and rhythm to a comfortable pace, refining the effort with each cycle.

With each inhalation, let expansion occur mainly in the abdomen, with a slight expansion of the ribcage and chest at the end of the breath. Observe the sensations that emerge—the coolness of the air in the nostrils, the movements in the abdomen and chest.

Distractions are normal and expected. Each time you become aware of a distraction, simply reconnect with the sensations of breathing. Avoid excessive effort to maintain focus, and do not judge yourself for distractions.

Gradually return to spontaneous breathing, expanding your awareness to perceive your whole body again—its posture, shape, and weight. Open your eyes slowly, and even as you begin to perceive the external environment, maintain most of your attention within your body.

### **Small, Localized Movement which Breath Integration**

Move to the edge of the chair, aligning your torso while ensuring minimal effort in your back muscles. We will begin with a sequence of fluid, slow movements, adjusting effort to only what is necessary.

#### **Neck Mobility Exercise**

- Let the weight of your head tilt laterally, allowing it to gently roll downward until the ear moves toward the opposite shoulder.
- Return to the center, moving slowly and smoothly.
- Now, synchronize this movement with deep breathing:
  - Inhale as the head moves to the side.
  - Exhale as the head rolls downward.

When the mind is agitated or when there is anxiety or pain, movements tend to speed up automatically. If this happens, simply acknowledge it and gently return to a slow, fluid pace.

#### **Thoracic Expansion Exercise**

- Place the fingertips at the back of the head, elbows open.
- Inhale, maintaining this expanded position with the elbows open.
- Exhale slowly and fully through the mouth, rounding the upper back and bringing the hands together in front of the chest.
- Repeat:
  - Inhale to open the elbows and extend the spine.
  - Exhale to round the back and bring the hands forward.

As in the beginning of the session, our psychological attitude is to observe the sensations arising from movement and breath. This is a fundamental element of our practice—welcoming all sensations that emerge, including unpleasant ones such as discomfort or emotional agitation.

Each repetition refines fluidity, effort regulation, and attentional awareness of body sensations. Practicing with eyes closed enhances internal focus and interoceptive awareness.

#### **Brief Stillness Pause**

- Release all movement, allowing automatic micro-adjustments to settle.
- Let your body be still for a few seconds, observing its form, volume, and weight.
- Notice the contrast between stillness and movement, inviting your attention to rest in this sensation of quietness.

### **Whole-Body Movements**

Move into a standing position, bringing the palms together in front of the pelvis, softening the knees.

#### **Full-Body Breath Coordination**

- Inhale through the nose as you raise both arms toward the ceiling, extending the knees.
- Exhale through the mouth as you bend the elbows and soften the knees, releasing the weight of the arms.
- Maintain a slow, continuous rhythm, accompanying the breath with detailed awareness of bodily sensations.
- Accept any discomfort without resistance, allowing sensations to be present without the need to change them.

#### **Spinal Flexion and Release**

- Step the left foot slightly forward, resting it on the floor.
- Let the head fold forward, rolling down vertebra by vertebra as the hands slide along the legs until reaching the feet.
- Release the weight of the head, arms, and shoulders.
- Slowly unroll the spine from the base to the top, returning to an upright position.
- Perform the same sequence with the other foot forward, observing the changing sensations along the spine, legs, and back.
- Maintain fluidity and even pacing, even if discomfort arises.

Pause and notice any differences between the left and right sides of the body.

### **Mindfulness on the Low Effort Abdominal Breath**

Return to a seated position with the back supported. Rest the hands on the thighs. Allow the body to fully settle into the support of the chair, releasing any remaining effort.

- Shift attention back to natural breathing, focusing on the sensation of air moving through the nostrils and the subtle abdominal oscillations.
- Allow the breath to flow with minimal effort while simply observing it without modification.
- If the mind wanders, gently bring attention back to the natural oscillation of the abdomen.
- Extend this absence of effort in breathing to the absence of effort in emotions or sensations—simply welcoming whatever arises.

Broaden awareness to the posture as a whole, and acknowledge the sounds from the environment as they reach your body.

Slowly begin to move gently, stretch, open the eyes, and transition out of the session while maintaining this refined awareness.

# **Example 2**

### **Landing attention into the body and deep breathing**

We will begin this session in a seated position, with the back supported by the chair. Rest your hands on your thighs, close your eyes, and let go of any tasks you were engaged in before. Allow your attention to move inward, toward your body.

Begin by noticing the contact between your hands and thighs, the sensation of touch and pressure. Then, observe the contact between your back and the chair, your pelvis, the back of your legs, and your feet on the floor. Allow your body to settle as movement gradually diminishes.

Bring awareness to your overall presence—your posture, shape, volume, and weight. Gradually shift your focus to your spontaneous breath, noticing the air passing through your nostrils and the subtle movements of your abdomen.

Now, begin to deepen your breath:

- Inhale slowly through your nose, with minimal effort, allowing the air to enter gradually and fully.
- Exhale through your mouth, releasing the air more slowly, without force.

As you breathe deeply, your abdomen expands naturally, with a slight expansion of the ribcage and chest at the end of the inhalation. As you exhale, your abdomen and chest gently release.

Adjust the effort, speed, and depth of your breathing to a pace that feels comfortable. As you continue, maintain awareness of each breath cycle, following the sensations that arise. When you notice your mind has wandered, gently redirect your attention back to the breath. Distraction is natural—simply return to the sensation of breathing whenever it happens.

Gradually, return to spontaneous breathing, expanding awareness once more to your whole body—its posture, shape, volume, and weight. Slowly open your eyes and, maintaining most of your attention within your body, transition into the next phase of the session.

### **Small, Localized Movement which Breath Integration**

Move to the edge of the chair, bringing your torso upright, ensuring minimal effort in your posture.

#### **Shoulder Elevation and Spinal Lengthening**

- Inhale deeply, lifting your shoulders toward your ears.
- Exhale slowly as your shoulders descend, allowing the spine to lengthen upward.
- Maintain slow, fluid movement, adjusting effort to the minimum necessary.
- With each cycle, focus on the subtle sensations of spinal elongation and shoulder movement.

As in every session, we will observe the sensations that arise from movement and breath, maintaining an open, nonreactive attitude toward any discomfort. Instead of resisting unpleasant sensations, we will notice them alongside other sensations without trying to change them.

#### **Standing Movements – Expanding and Releasing Effort**

Move into a standing position. If your microphone is on, please mute it.

- Stand with feet slightly apart and knees softened.
- Bring your hands together as if holding a ball in front of your lower abdomen, keeping minimal tension in your arms and shoulders.
- Inhale as you lift the hands to chest height, extending the knees.
- Exhale as you open the arms outward, expanding through the chest.
- Inhale as you bring the arms forward, rounding the posture slightly.
- Exhale as you soften the knees, slowly lowering the arms.

Maintain a fluid transition between movements, moving slowly and continuously. Even when the eyes remain open, keep most of your attention focused on bodily sensations.

If agitation, anxiety, or restlessness arises, the natural tendency is for movement to become faster. When you notice this happening, gently return to a slow, controlled rhythm, allowing time to observe each phase of the movement.

### **Whole-Body Movement**

#### **Rotational Movement with Breath Awareness**

- With feet grounded, allow the pelvis, torso, and arms to rotate together.
- Lift one arm diagonally upward, allowing the torso and pelvis to follow the movement.
- As you exhale, lower the arm and rotate back to center.
- Adjust effort in the shoulders and torso, ensuring a coordinated and minimal-effort movement.
- Repeat on the opposite side, noticing differences in sensation between left and right.

Maintain slow, continuous breathing, adjusting the effort and allowing the body to move with ease.

### **Brief Stillness Pause**

After completing the movement, return to stillness:

- Close your eyes and observe any sensations in the body.
- Notice the contrast between movement and stillness.
- Allow any automatic adjustments to settle.

Simply observe for a few seconds without making any deliberate changes.

### **Mindfulness on the Low Effort Abdominal Breath**

Return to a seated position, resting the back against the chair. Allow the body to fully relax into the support of the chair.

- Shift attention back to natural breathing, focusing on the subtle oscillations of the abdomen.
- Allow the breath to flow with minimal effort, simply observing without modifying it.
- When the mind wanders, gently return to the movement of the breath.

There is no need to change emotions or sensations—simply allow them to be present, observing them as they are.

Expand awareness once more to your whole posture and the sounds of the environment reaching your body.

Slowly begin to stretch, open your eyes, and transition out of the session while maintaining this refined awareness.

### **Session 3**

#### **Landing Attention into the Body and Deep Breathing**

Adjust your posture, allowing your back to rest against the chair. Place your hands on your thighs, close your eyes, and let go of previous thoughts, tasks, or plans. For the next few minutes, allow your attention to turn inward, fully engaging with bodily sensations.

Invite awareness into your body by sequentially noticing the presence of different areas:

- The head and face
- The neck and shoulders
- The arms, forearms, and hands
- The back, chest, and abdomen
- The pelvis, glutes, and perineum
- The thighs, legs, and feet

Notice your body as a whole—its shape, volume, and weight—while also becoming aware of the contact points between your body and the chair, the sensation of clothing against your skin, and any areas of muscular effort. Bring attention to any unnecessary tension and gently release it.

Even in stillness, subtle movement occurs with each breath. Intentionally lengthen this natural motion:

- Inhale slowly and gently through the nose, with minimal effort, allowing the air to enter gradually.
- Exhale through the mouth, slowing down the release of air without force.

As the breath deepens, observe the gentle expansion and release in the abdomen and chest. Let the breath remain slow and effortless, staying within your comfort zone. Each breath cycle offers a chance to refine and adjust, maintaining a smooth rhythm.

Distractions are natural—whenever you notice your mind wandering, acknowledge it and gently guide your attention back to the rhythm of breathing. For these next few moments, let your only focus be on tracking the details of each breath cycle.

Gradually, return to your spontaneous breath, expanding awareness back to your entire body. Observe its shape, weight, and volume once again. When ready, slowly open your eyes, remaining connected to your internal sensations as you transition into the next movement phase.

### **Small, Localized Movement with Breath Integration**

Move to the edge of the chair, bringing your torso upright with minimal effort. Allow unnecessary tension in the shoulders, face, and pelvic floor to release.

#### **Seated Hip Hinge with Breath Awareness**

- Inhale deeply to prepare.
- Exhale slowly as you tilt forward from the hips, keeping the spine neutral.
- Notice the sensation of gentle stretching along the back of the thighs.
- Inhale as you return to an upright position, maintaining a slow, fluid motion.

Ensure the movement originates from the pelvis rather than the spine. Adjust your effort, avoiding excessive engagement of the neck or shoulders.

On the next repetition, **pause in the forward position**:

- Adjust your posture to minimize unnecessary effort.
- Bring attention specifically to the stretch sensation at the back of the thigh.
- Maintain calm, receptive awareness of the effort involved.

Slowly return to an upright position, noticing how the stretch sensation fades. Compare sensations between the right and left legs before switching sides.

#### **Thoracic Rounding and Expansion**

- Place your hands behind your head, elbows open.
- Inhale deeply, gently arching the mid-back as you open the elbows wider.
- Exhale slowly, rounding the mid-back and bringing the elbows forward.

Observe the changing sensations with each movement phase. Accept any discomfort without resistance, recognizing that this movements are safe for your body.

After completing repetitions, release your arms, lean back into the chair, and allow all effort to settle.

### **Brief Stillness Pause**

Remain still, avoiding automatic adjustments.

- Observe your body as a whole—its shape, volume, and weight.
- Notice the contrast between movement and stillness and allow your attention to settle into this quietness.
- Release any remaining muscular effort, letting the body fully rest.

For a few moments, simply observe without any intention to change sensations.

### **Whole-Body Movements with Breath Coordination**

Transition to a standing position.

#### **Lunging Stretch with Overhead Reach**

- Step one foot forward, keeping the back leg straight.
- Interlace the hands at chest height.
- Inhale as you bend the front knee and raise the arms overhead, reaching slightly backward.
- Exhale as you return to the starting position, slowly lowering the arms.

Observe stretch sensations in the chest and shoulders.

On the final repetition, pause with arms overhead:

- Adjust unnecessary effort.
- Observe stretch sensations in the chest, arms, and front of the hips.
- Maintain most of your attention on bodily sensations rather than external surroundings.

Slowly return to the starting position, noticing the gradual release of stretch sensations. Repeat on the opposite side.

#### **Rotational Movement with Breath Awareness**

- Stand with feet hip-width apart and knees slightly relaxed.
- As you bend one knee, allowing the hip to slightly open, lift the arm on the same side diagonally upward.
- Simultaneously, rotate the head to follow the direction of the lifted arm, while keeping the torso and pelvis stable.
- Observe the movement in each part of the body separately—the knee bending, the arm lifting, and the head rotating—while also noticing their synchronization as a whole.
- Inhale as you lift the arm and rotate the head, maintaining a smooth, controlled motion.
- Exhale slowly as you return to the center, straightening the bent knee, rotating the head back to a neutral position, and lowering the arm smoothly.
- Repeat on the opposite side, ensuring a fluid, continuous movement with minimal effort.

Throughout the exercise, guide your attention to the **coordination between breath and movement**, noticing how each phase unfolds in a **harmonized rhythm**

#### **Side Bend with Arm Sweep**

- Tilt your head to one side.
- Once the neck reaches its full comfortable range, lift the opposite arm overhead.
- Continue the movement, allowing the torso to bend laterally.
- Rotate the chest slightly downward, releasing the arm toward the floor.
- Return to the upright position in reverse order.

Maintain smooth, controlled pacing, avoiding sudden shifts in movement.

After completing one side, return to a neutral standing posture, noticing any differences between left and right sensations.

### **Mindfulness on the Low-Effort Abdominal Breath**

Return to a seated position, allowing your back to fully relax into the chair’s support.

- Release any remaining muscular effort, letting your weight sink into the chair.
- Shift attention to spontaneous breathing, noticing the subtle oscillations of the abdomen.

Observe how the breath flows naturally, without controlling it.

- Allow breathing to be effortless.
- Let your attention rest on the natural rhythm of the abdomen’s gentle rise and fall.

If the mind drifts, simply return to the abdominal oscillation without force.

Extend this absence of effort into an attitude of receiving—allowing all bodily sensations and emotions to be present without trying to change them.

Broaden awareness to the whole posture, then acknowledge external sounds as they reach your perception.

Gradually reintroduce movement, stretching gently. Open your eyes while maintaining the refined awareness developed during the session.
